# Supplementary material
Source: PubMed Central journal article supplement (PMC5591763)

Table E1

| Laboratory Evaluation                              | Reference Ranges             | 2014                   | 2015                   | 2016                   |
|----------------------------------------------------|------------------------------|------------------------|------------------------|------------------------|
| <b>WBC (K/mcL)</b>                                 | 4.5-13.5K/mcL                | <b>2</b>               | <b>4</b>               | <b>2.4</b>             |
| <b>Hgb (gm/dL)</b>                                 | 12-16 gm/dL                  | 11                     | 12                     | 13.9                   |
| <b>PLT (K/mcL)</b>                                 | 135-466K/mcL                 | <b>92</b>              | 178                    | <b>91</b>              |
| <b>Neutrophils</b>                                 | 40-62%                       | <b>15</b>              | 40                     | <b>31</b>              |
| <b>Lymphocytes</b>                                 | 15-45%                       | <b>63</b>              | 44                     | <b>52</b>              |
| <b>Monocytes</b>                                   | 0-8%                         | <b>16</b>              | <b>11</b>              | <b>9</b>               |
| <b>Eosinophils</b>                                 | 0-5%                         | 4                      | 4                      | 8                      |
| <b>Basophils</b>                                   | 0-1%                         | 1                      | 1                      | 0                      |
| <b>ANC (mcL)</b>                                   | 1.8-8K/mcL                   | <b>0.3</b>             | 1.6                    | <b>0.74</b>            |
| <b>ALC (mcL)</b>                                   | 1.5-6.5K/mcL                 | 1.2                    | 1.76                   | 1.25                   |
| <b>Reticulocytes</b>                               | 0.5-1.5%                     | 1.9                    | 2.8                    | 2                      |
| <b>Direct Coombs</b>                               | -                            | +                      | +                      | -                      |
| <b>Anti-neutrophil Abs</b>                         | -                            | +                      | +                      | +                      |
| <b>Anti-PLT Abs</b>                                | -                            | +                      | +                      | +                      |
| <b>Anti-Class I/II Abs</b>                         |                              | -                      | +                      | +                      |
| <b>Lymphocyte subsets</b>                          |                              |                        |                        |                        |
| <b>CD3</b>                                         | 52-78%<br>800-3500 cells/mcL | 77 %<br>1309           | 77%<br>1243            | 78%<br>1092            |
| <b>CD4</b>                                         | 25-48%<br>400-2100 cells/mcL | 44%<br>694             | 43%<br>689             | 48%<br>663             |
| <b>CD8</b>                                         | 9-35%<br>200-1200 cells/mcL  | 32%<br>545             | 29%<br>469             | 25%<br>349             |
| <b>CD19</b>                                        | (8-24%)<br>200-600 cells/mcL | 21%<br>358             | 20%<br>324             | 20%<br>276             |
| <b>CD16/56</b>                                     | 6-27%<br>70-1200             | <b>1%</b><br><b>17</b> | <b>2%</b><br><b>38</b> | <b>1%</b><br><b>19</b> |
| <b>CD4/CD8</b>                                     | 1.0-3.6                      | 1.3                    | 1.5                    | 1.9                    |
| <b>FOXP3+Tregs</b>                                 | 55-81%                       | 68                     | 58                     | 61                     |
| <b>CD4+25+127 low Tregs</b>                        | 4.2-9.9% of CD4+             | 4.4                    | 4.4                    | 4.4                    |
| <b>TCRV11/VA24</b>                                 | >=0.01%                      | 0.06                   |                        |                        |
| <b>CD4+CCR6+CD45RA-*</b>                           | 10.7-27% of CD4+             | 20.1                   | 19.3                   |                        |
| <b>CCR6+CD45RA-IL-17A+</b>                         | 1.2-4.6% of * cells          | <b>5.6</b>             | 3.6                    |                        |
| <b>ALPS Markers</b>                                |                              |                        |                        |                        |
| <b>IL-10</b>                                       | <=7 pg/mL                    | 5                      | 1                      | 6                      |
| <b>IL-18</b>                                       | 89-540 pg/mL                 | 657                    | 499                    | 614                    |
| <b>Vit B12</b>                                     | 193-986 pg/mL                | 774                    | 788                    | 775                    |
| <b>Fas-apoptosis cell loss</b>                     | 55-95%                       | 81                     |                        | 97                     |
| <b>TCR<math>\alpha\beta</math>-DNT cells*</b>      | > 2% of lymphocytes*         | <b>2.6</b>             | <b>1.9</b>             | <b>2.6</b>             |
| <b>B220 TCR<math>\alpha\beta</math>-DNT cells*</b> | > 60% of DNT cells*          | 19                     | 22                     | 32                     |
| <b>CD3+CD25+HLA/DR ratio*</b>                      | < 1*                         | 1                      | 1.1                    | 1                      |
| <b>CD27+ B cells*</b>                              | < 15% of B cells*            | <b>8</b>               | <b>8</b>               | <b>9</b>               |
| <b>IgG</b>                                         | 600-1500 mg/dL               | 1150                   | On IVIG                | On IVIG                |
| <b>IgM</b>                                         | 60-263 mg/dL                 | <b>54</b>              | 71                     | 166                    |
| <b>IgA</b>                                         | 68-378 mg/dL                 | 200                    | 213                    | 234                    |
| <b>IgE</b>                                         | 2-214 mg/dL                  | 3                      | -                      | 3                      |
| <b>B-cell Panel</b>                                |                              |                        |                        |                        |
| <b>CD19+ B cells</b>                               | 8- 24 %                      | 15                     | 18                     |                        |
| <b>CD19+CD27-CD21-IgM++</b>                        | 0.5- 2.8 %                   | <b>6.7</b>             | <b>5.7</b>             |                        |
| <b>CD19+CD27-</b>                                  | 61- 83 %                     | <b>87</b>              | <b>89</b>              |                        |
| <b>CD19+CD27-IgM+IgD+</b>                          | 53- 79 %                     | <b>83</b>              | <b>85</b>              |                        |
| <b>CD19+CD27-IgM+IgD+</b>                          | 80- 97 % of CD27-            | 95                     | 95                     |                        |
| <b>CD19+CD27-CD21-CD38-</b>                        | 0.3- 2.3 %                   | <b>4.4</b>             | <b>5</b>               |                        |
| <b>CD19+CD27+</b>                                  | 17- 39 %                     | <b>13</b>              | <b>11</b>              |                        |
| <b>CD19+CD27+IgM+IgD+</b>                          | 8- 22 %                      | 10                     | 9                      |                        |
| <b>CD19+CD27+IgM+IgD+</b>                          | 30-76 % of CD27+             | <b>79</b>              | <b>78</b>              |                        |
| <b>CD19+CD27+IgM-IgD-</b>                          | 2.3- 18.2 %                  | <b>1.8</b>             | <b>1.7</b>             |                        |
| <b>CD19+CD27+IgM-IgD-</b>                          | 14-44 % of CD27+             | 14                     | 15                     |                        |

Table E1

**Table E1. A. Immunological Evaluation at Referral and Follow-up Visits**

Bold values represent abnormal values.

\* Parameters specific for flow cytometry based ALPS panel. Reference values indicate positive ALPS score for each parameter.

HC

Father

Mother-mutant  
asymptomatic

Patient

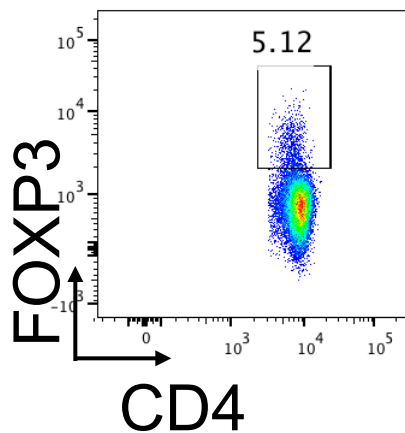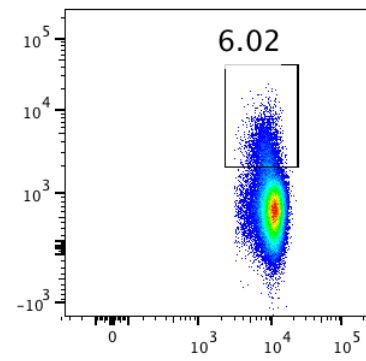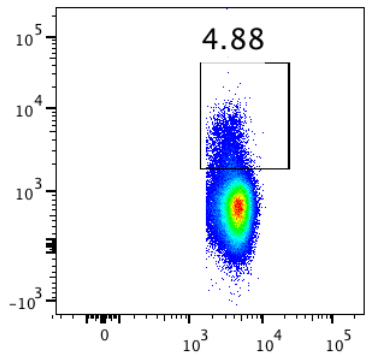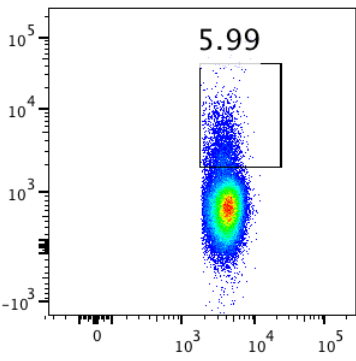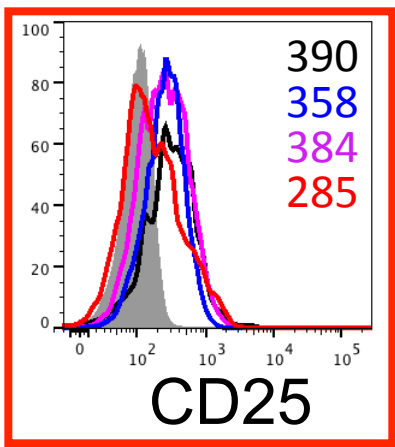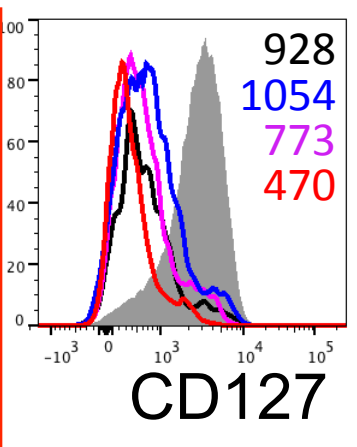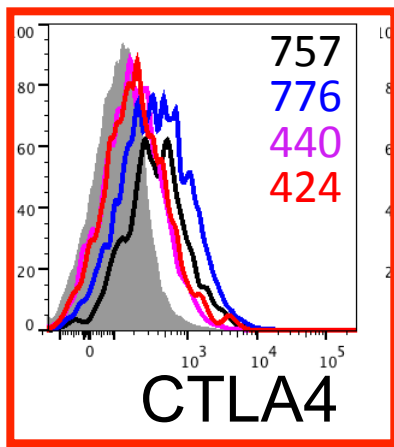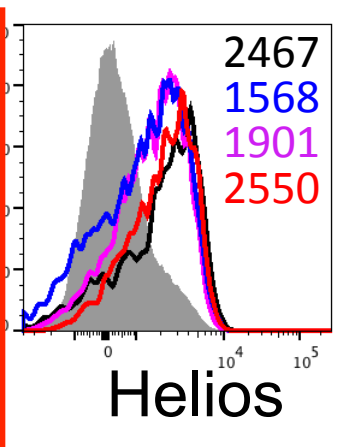

— T<sub>REG</sub> HC  
 — T<sub>REG</sub> Father  
 — T<sub>REG</sub> Mother  
 — T<sub>REG</sub> Patient

Ctrl

Patient

Father

Mother-carrier

Gated on  
CD4<sup>+</sup> T cells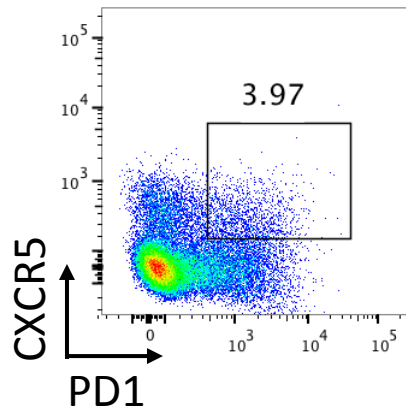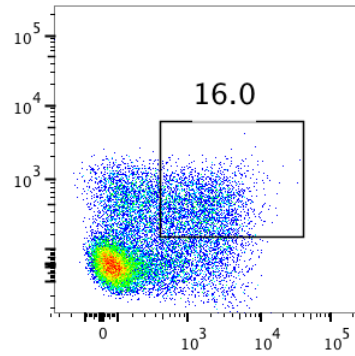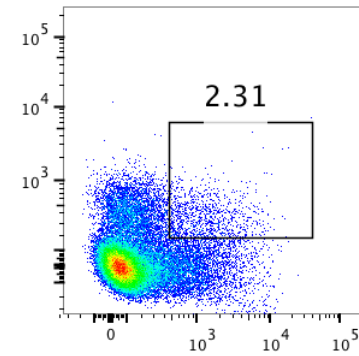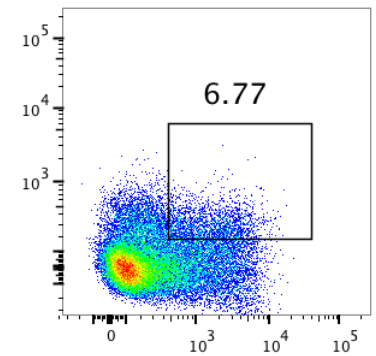Gated on  
T<sub>FH</sub> cells  
(CXCR5+PD1+)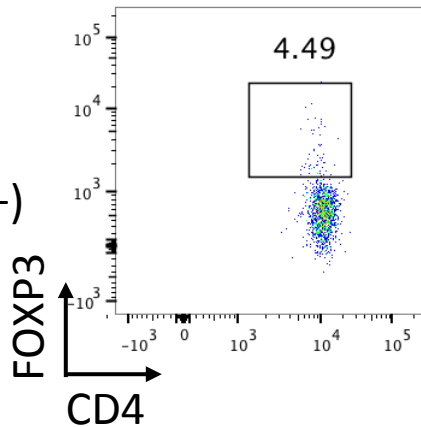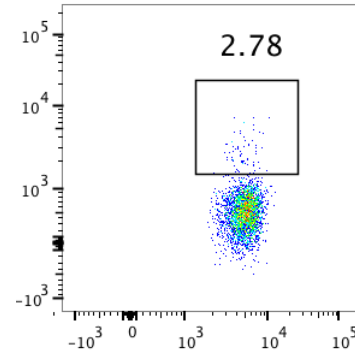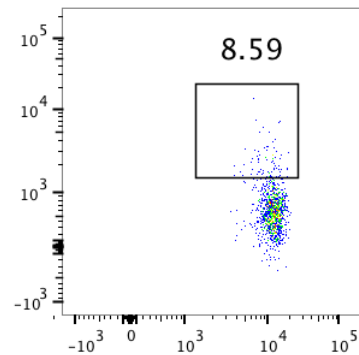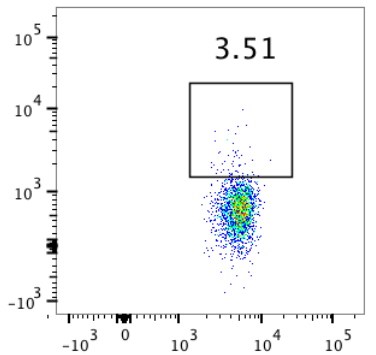Gated on  
T<sub>FH</sub> cells  
(CXCR5+PD1+)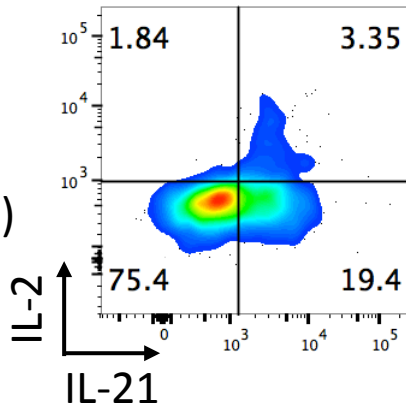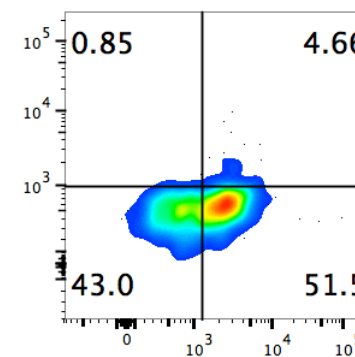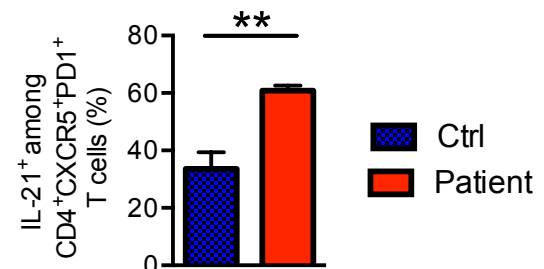

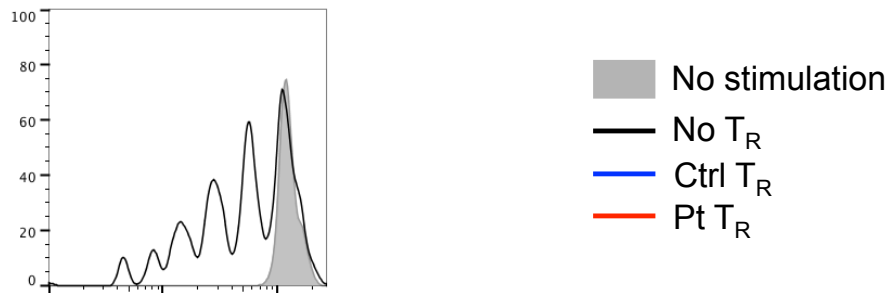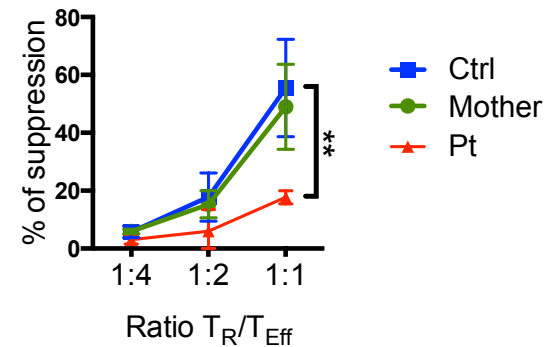

Ratio  $T_R/T_{Eff}$

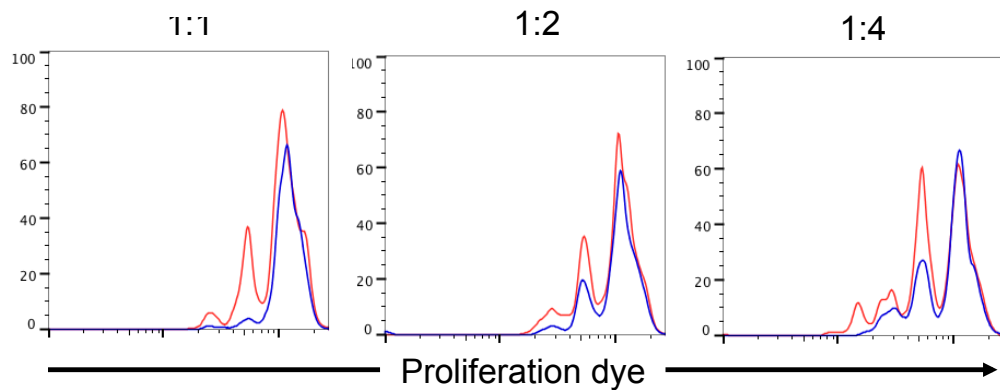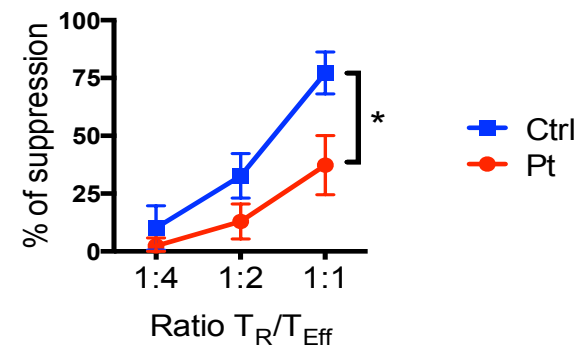

Supplement: NIHMS864255-supplement-supplement_1.pdf [file NIHMS864255-supplement-supplement_1.pdf]
